# Supplementary material for: Variation in Maize Grain Yield Indices When Exposed to Combined Heat and Water Stress Conditions under Different Soil Amendments
Source: MDPI journal article supplement (doi:10.3390/su14095150), 2022-04-25
Supplement: s1 [file s1]

## Supplementary Tables

**Table S1.** Treatment description.

| S/N | Factor                    | Levels                                                                                                    |
|-----|---------------------------|-----------------------------------------------------------------------------------------------------------|
| 1   | Factor A: Water Stress    | Non-water stress (NS, well-watered)<br>moderate water stress (MS), and<br>near terminal water stress (TS) |
| 2   | Factor B: Maize cultivars | WE3128,<br>WE5323, and<br>ZM1523                                                                          |
| 3   | Factor C: Soil types      | Loamy sandy soil (LS) from Molelwane and<br>Sandy clay loam soil (SCL) from Tlapeng                       |
| 4   | Factor D: Soil amendments | Poultry manure (PM),<br>mineral fertilizer (MF) and<br>mixed PM+MF (50:50)                                |
